# Supplementary material for: Interplay of disordered and ordered regions of a human small heat shock protein yields an ensemble of ‘quasi-ordered’ states
Source: eLife. 2019 Oct 1;8:e50259. doi: 10.7554/eLife.50259 (PMC6791718; doi:10.7554/eLife.50259)
Supplement: Figure 7—source data 1. — The deconvoluted fractions of each population from bimodal distributions are shown in the first two columns for each mutant. The fractional deuterium uptake for each of these populations is shown in the next two columns, followed by a weighted average in the fifth column. All spectra were binomial fit using HX-Express (Guttman et al., 2013). [file elife-50259-fig7-data1.xlsx]

## Sheet: Deuteration_table
HDXMS profiles for all forms of HSPB1. The deconvoluted fractions of each population from bimodal distributions are shown in the first two columns for each mutant. The fractional deuterium uptake for each of these populations is shown in the next two columns, followed by a weighted average in the fifth column. All spectra were binomial fit using HX-Express.
			WT					HSPB1 dimer					G34R					P39L					G84R
Peptide			Population fraction		Deuteration			Population fraction		Deuteration			Population fraction		Deuteration			Population fraction		Deuteration			Fraction		Population
Start	End	Time	1	2	1	2	Avg	1	2	1	2	Avg	1	2	1	2	Avg	1	2	1	2	Avg	1	2	1	2	Avg
1	10	3 sec	0.389241	0.610759	0.408479	0.962775	0.747021	0.853977	0.146023	0.381392	0.87197	0.453028	0.367993	0.632007	0.412771	0.966006	0.762419	0.516682	0.483318	0.433361	0.959069	0.687445	0.426466	0.573534	0.404273	0.926442	0.703755
		15 sec	0.384108	0.615892	0.507205	0.988365	0.803548	0.85555	0.14445	0.52727	0.992462	0.594467	0.335045	0.664955	0.543449	0.982922	0.835678	0.45239	0.54761	0.534325	0.9719	0.773945	0.323111	0.676889	0.510763	0.932067	0.795939
		1 min	0.349015	0.650985	0.584848	0.994384	0.851449	1	0	0.806173	0	0.806173	0.266649	0.733351	0.617321	0.975003	0.879627	0.462067	0.537933	0.64514	0.974394	0.822257	0.164037	0.835963	0.557097	0.898389	0.842404
		4 min	1	0	0.913471	0	0.913471	1	0	0.9597	0	0.9597	1	0	0.951926	0	0.951926	1	0	0.888051	0	0.888051	1	0	0.914444	0	0.914444
		1 hr	1	0	0.957917	0	0.957917	1	0	0.958372	0	0.958372	1	0	0.959997	0	0.959997	1	0	0.939966	0	0.939966	1	0	0.952495	0	0.952495
1	11	3 sec	0.382355	0.617645	0.324629	0.93588	0.702165	0.892505	0.107495	0.326808	0.894747	0.387858	0.337352	0.662648	0.318796	0.934848	0.727022	0.443055	0.556945	0.310665	0.894474	0.635815	0.38363	0.61637	0.284292	0.879106	0.650917
		15 sec	0.339377	0.660623	0.38318	0.968156	0.769628	0.829849	0.170151	0.447172	0.925961	0.528639	0.252831	0.747169	0.386923	0.964328	0.818342	0.362934	0.637066	0.38703	0.94119	0.740066	0.30093	0.69907	0.377587	0.940297	0.770961
		1 min	0.325524	0.674476	0.496881	0.964153	0.812045	0.401085	0.598915	0.587139	0.868885	0.755881	0.229413	0.770587	0.510919	0.972157	0.866343	0.29357	0.70643	0.455727	0.940067	0.79788	0.288547	0.711453	0.502252	0.952964	0.822912
		4 min	0.265481	0.734519	0.616669	0.968246	0.874909	1	0	0.959272	0	0.959272	1	0	0.958746	0	0.958746	0.224471	0.775529	0.532729	0.953001	0.858662	1	0	0.91868	0	0.91868
		1 hr	1	0	0.95185	0	0.95185	1	0	0.962644	0	0.962644	1	0	0.965325	0	0.965325	1	0	0.94096	0	0.94096	1	0	0.954252	0	0.954252
2	10	3 sec	0.455318	0.544682	0.328064	0.954334	0.669182	0.648323	0.351677	0.275109	0.61418	0.394353	0.402821	0.597179	0.308809	0.963545	0.699804	0.501379	0.498621	0.310243	0.931573	0.620051	0.425225	0.574775	0.27164	0.915297	0.641598
		15 sec	0.423185	0.576815	0.403068	0.974643	0.732761	0.791084	0.208916	0.440028	0.885033	0.532997	0.368069	0.631931	0.440546	0.976656	0.77933	0.416924	0.583076	0.39512	0.947991	0.717486	0.339125	0.660875	0.361983	0.939124	0.743401
		1 min	0.390661	0.609339	0.494636	0.959798	0.778077	1	0	0.772863	0	0.772863	0.305898	0.694102	0.557487	0.976256	0.848156	0.521399	0.478601	0.57732	0.994631	0.777046	0.435308	0.564692	0.572934	1	0.814095
		4 min	1	0	0.898433	0	0.898433	1	0	0.956978	0	0.956978	1	0	0.940151	0	0.940151	0.473435	0.526565	0.705863	0.979434	0.849916	1	0	0.912297	0	0.912297
		1 hr	1	0	0.949154	0	0.949154	1	0	0.962607	0	0.962607	1	0	0.958357	0	0.958357	1	0	0.943913	0	0.943913	1	0	0.971009	0	0.971009
2	11	3 sec	0.467992	0.532008	0.262407	0.936615	0.621091	0.745072	0.254928	0.225701	0.595379	0.319942	0.444652	0.555348	0.280084	0.925065	0.638273	0.558856	0.441144	0.286359	0.896251	0.555409	0.535389	0.464611	0.264417	0.889883	0.555016
		15 sec	0.443504	0.556496	0.340275	0.974168	0.693034	0.698311	0.301689	0.342287	0.754111	0.46653	0.377883	0.622117	0.402913	0.967662	0.754253	0.50761	0.49239	0.396303	0.962365	0.675026	0.433412	0.566588	0.363018	0.944808	0.692653
		1 min	0.390625	0.609375	0.430963	0.967671	0.758019	0.563356	0.436644	0.584994	0.891352	0.718763	0.273816	0.726184	0.493633	0.954591	0.828373	0.502436	0.497564	0.52335	0.971638	0.746402	0.333642	0.666358	0.452069	0.938629	0.776292
		4 min	0.362726	0.637274	0.597354	0.976822	0.839179	1	0	0.947982	0	0.947982	1	0	0.951211	0	0.951211	0.402974	0.597026	0.636635	0.976105	0.839307	0.256933	0.743067	0.633084	0.959629	0.875729
		1 hr	1	0	0.948562	0	0.948562	1	0	0.964122	0	0.964122	1	0	0.969683	0	0.969683	1	0	0.939853	0	0.939853	1	0	0.958691	0	0.958691
11	28	3 sec					0.608926					0.75836					0.646555					0.518473					0.590716
		15 sec					0.766946					0.842585					0.871183					0.74639					0.832146
		1 min					0.848782					0.899524					0.926721					0.85466					0.904458
		4 min					0.88097					0.968413					0.938622					0.902152					0.921327
		1 hr					0.974965					0.955988					0.9223					0.916865					0.911313
12	28	3 sec					0.580422					0.813919					0.608712					0.478958					0.552652
		15 sec					0.747644					0.880993					0.852054					0.712653					0.806533
		1 min					0.85141					0.871035					0.914946					0.832126					0.884878
		4 min					0.873515					0.895709					0.923766					0.879327					0.896759
		1 hr					0.918709					0.878824					0.907899					0.892984					0.889866
29	41	3 sec	0.665865	0.334135	0.45128	0.929854	0.611188					0.676298	0.169682	0.830318	0.450113	0.834414	0.769205	0.400178	0.599822	0.146898	0.537687	0.381302	0.227415	0.772585	0.409383	0.774267	0.691287
		15 sec	0.506476	0.493524	0.47992	0.962008	0.717842					0.756431	1	0	0.970572	0	0.970572	0.435189	0.564811	0.363657	0.83786	0.631492	1	0	0.942959	0	0.942959
		1 min	0.464096	0.535904	0.581085	1	0.805583					0.875621	1	0	0.976691	0	0.976691	0.208135	0.791865	0.389475	0.90096	0.794502	1	0	0.961732	0	0.961732
		4 min	1	0	0.910473	0	0.910473					0.983516	1	0	0.983777	0	0.983777	0.0930322	0.906968	0.408925	0.942625	0.892974	1	0	0.973006	0	0.973006
		1 hr	1	0	0.985235	0	0.985235					0.985263	1	0	0.968875	0	0.968875	1	0	0.954735	0	0.954735	1	0	0.962348	0	0.962348
29	43	3 sec																					0.218684	0.781316	0.453909	0.795701	0.720956
		15 sec																					1	0	0.946319	0	0.946319
		1 min																					1	0	0.965588	0	0.965588
		4 min																					1	0	0.972034	0	0.972034
		1 hr																					1	0	0.961884	0	0.961884
33	41	3 sec					0.699477					0.490035					0.737812										0.661339
		15 sec					0.827351					0.60905					0.961495										0.926151
		1 min					0.893275					0.809685					0.958811										0.957396
		4 min					0.939019					0.979995					0.995358										0.964342
		1 hr					0.986148					0.983638					0.975135										0.950691
42	62	3 sec	0.37965	0.62035	0.570708	0.922551	0.788974					0.615892	0.149082	0.850918	0.491222	0.831794	0.781021	0.318103	0.681897	0.316797	0.711447	0.585908	0.223992	0.776008	0.479205	0.788152	0.71895
		15 sec	0.188174	0.811826	0.616289	0.938195	0.877621					0.738171	0.0471554	0.952845	0.456677	0.972143	0.947836	0.200248	0.799752	0.44746	0.887443	0.799337	1		0.942628	0	0.942628
		1 min	1	0	0.970797	0	0.970797					0.896283	1	0	0.981239	0	0.981239	1	0	0.936246	0	0.936246	1		0.968125	0	0.968125
		4 min	1	0	1.00296	0	1.00296					0.999077	1	0	0.98973	0	0.98973	1	0	0.977714	0	0.977714	1		0.979934	0	0.979934
		1 hr	1	0	1.09012	0	1.09012					1.00638	1	0	0.97697	0	0.97697	1	0	0.98247	0	0.98247	1		0.969188	0	0.969188
54	62	3 sec										0.877239	0.269695	0.730305	0.53404	0.839675	0.757247	0.311662	0.688338	0.359943	0.760757	0.635839					0.699518
		15 sec										0.878234	1	0	0.96659	0	0.96659	1	0	0.882286	0	0.882286					0.937731
		1 min										0.955193	1	0	0.984057	0	0.984057	1	0	0.945772	0	0.945772					0.985027
		4 min										1.12593	1	0	0.992917	0	0.992917	1	0	0.982329	0	0.982329					1.00169
		1 hr										1.04506	1	0	0.987026	0	0.987026	1	0	0.991092	0	0.991092					0.993895
55	62	3 sec					0.846317					0.956884					0.778984					0.708272					0.720877
		15 sec					0.953606					0.99877					0.964985					0.914426					0.940475
		1 min					1.01594					1.01806					0.98598					0.975353					0.977417
		4 min					1.01324					1.0295					0.989505					1.0017					0.982311
		1 hr					1.01725					1.03081					0.980623					0.994215					0.979196
55	76	3 sec															0.952459					0.885543					-
		15 sec															0.998125					0.958899					0.964242
		1 min															1.00299					0.972194					0.977455
		4 min															1.00633					0.990525					0.986262
		1 hr															0.997238					0.988777					0.977127
63	73	3 sec					0.997918										0.972724					0.940405					0.962089
		15 sec					1.00556										0.986074					0.982275					0.985588
		1 min					1.00201										0.982982					0.985144					0.99728
		4 min					1.00835										0.992203					0.998333					1.00513
		1 hr					1.01121										0.980482					1.00185					0.996342
63	76	3 sec					0.992093					0.997511					0.978668					0.954306					0.96993
		15 sec					0.999113					0.989011					0.987135					0.975618					0.981489
		1 min					0.988801					0.987673					0.987644					0.979199					0.988498
		4 min					1.0001					1.00954					0.984895					0.987022					0.993273
		1 hr					1.0013					0.992476					0.976221					0.988406					0.984327
63	84	3 sec															0.981524
		15 sec															0.984055
		1 min															0.978431
		4 min															0.983904
		1 hr															0.970277
63	99	3 sec										0.841308					0.803161	0.237263	0.762737	0.468106	0.7699	0.698295
		15 sec										0.799751					0.82849	0.231909	0.768091	0.569075	0.798207	0.745069
		1 min										0.807016					0.844873	0.319339	0.680661	0.650686	0.831441	0.773719
		4 min										0.877267					0.875706	0.267899	0.732101	0.6869	0.867442	0.819075
		1 hr										0.888394					0.899098	1	0	0.878284	0	0.878284
77	84	3 sec					0.908779										0.977695					0.936202
		15 sec					0.966392										0.977779					0.956716
		1 min					0.960891										0.973923					0.962511
		4 min					0.984029										0.974789					0.97618
		1 hr					0.982512										0.962048					0.970979
77	87	3 sec	0.516458	0.483542	0.622569	0.990012	0.800243					0.977892					0.973444	0.214073	0.785927	0.436394	0.944001	0.835336					0.96538
		15 sec	0.460581	0.539419	0.668232	1	0.847194					0.983594					0.973184	0.279813	0.720187	0.626243	0.958642	0.865633					0.959754
		1 min	0.484717	0.515283	0.72	1	0.864279					0.966117					0.973669	0.235894	0.764106	0.686235	0.960403	0.895728					0.970751
		4 min	0.349723	0.650277	0.758719	1	0.915618					0.99358					0.965463	0.28539	0.71461	0.755174	0.989321	0.922498					0.975376
		1 hr	1	0	0.975763	0	0.975763					0.973153					0.955439	1	0	0.962814	0	0.962814					0.963495
77	99	3 sec	0.467064	0.532936	0.36845	0.682493	0.535815					0.667273					0.685501	0.290313	0.709687	0.323559	0.669676	0.569194					0.657624
		15 sec	0.3947	0.6053	0.333411	0.637736	0.517619					0.686342					0.71688	0.261956	0.738044	0.383162	0.687003	0.60741					0.687721
		1 min	0.380088	0.619912	0.44827	0.74097	0.629718					0.712984					0.746704	0.179345	0.820655	0.399091	0.711495	0.655467					0.730513
		4 min	0.284016	0.715984	0.431309	0.709208	0.63028					0.802566					0.793172	0.154567	0.845433	0.459769	0.766153	0.718796					0.785571
		1 hr	1	0	0.801401	0	0.801401					0.82698					0.840234	1	0	0.813382	0	0.813382					0.826268
87	99	3 sec					0.276632					0.348751					0.327406					0.284713
		15 sec					0.321026					0.376667					0.381391					0.317529
		1 min					0.39062					0.455685					0.450662					0.40296
		4 min					0.461515					0.599212					0.565864					0.498416
		1 hr					0.599321					0.662736					0.679185					0.63337
88	95	3 sec					0.494436					0.577628					0.589085					0.532234					0.583743
		15 sec					0.543142					0.597214					0.624979					0.564117					0.607376
		1 min					0.569847					0.59084					0.6394					0.605748					0.633523
		4 min					0.634401					0.716584					0.678536					0.66248					0.693859
		1 hr					0.740614					0.771104					0.827058					0.775099					0.823405
88	99	3 sec					0.238104					0.276612					0.252157					0.230154					0.248874
		15 sec					0.285629					0.310154					0.307171					0.281983					0.309229
		1 min					0.361075					0.400881					0.384399					0.357851					0.402298
		4 min					0.434228					0.558521					0.503982					0.45784					0.51939
		1 hr					0.557083					0.631925					0.636277					0.589068					0.623009
100	109	3 sec					0.0974483					0.0972719					0.114489					0.0934778					0.10567
		15 sec					0.120836					0.109506					0.211305					0.145583					0.192551
		1 min					0.161532					0.14847					0.294653					0.207386					0.272462
		4 min					0.220863					0.230213					0.418633					0.296393					0.39555
		1 hr					0.378985					0.415806					0.684111					0.559811					0.679118
110	132	3 sec					0.219238					0.268774					0.27661					0.255222					0.266791
		15 sec					0.244835					0.288371					0.333394					0.293212					0.318853
		1 min					0.26982					0.335637					0.375614					0.325875					0.364751
		4 min					0.311565					0.410914					0.418905					0.375998					0.410904
		1 hr					0.449819					0.493254					0.522763					0.497221					0.519211
110	137	3 sec					0.200605					0.238015					0.26275					0.246457					0.254905
		15 sec					0.161487					0.243331					0.310103					0.278208					0.300096
		1 min					0.240341					0.291038					0.349482					0.307154					0.341758
		4 min					0.222211					0.378317					0.404011					0.3563					0.399694
		1 hr					0.416006					0.576258					0.570783					0.505986					0.567126
133	149	3 sec					0.232083	1	0	0.248573	0	0.248573					0.230578					0.220138					0.220584
		15 sec					0.253312	1	0	0.264966	0	0.264966					0.266136					0.257867					0.254305
		1 min					0.276992	1	0	0.308653	0	0.308653					0.295022					0.283528					0.280275
		4 min					0.318563	1	0	0.355866	0	0.355866					0.350695					0.330522					0.333417
		1 hr					0.385263	0.229823	0.770177	0.320796	0.728838	0.63506					0.524409					0.43445					0.502812
138	149	3 sec					0.326943					0.355932					0.312524					0.297244					0.299525
		15 sec					0.357796					0.38143					0.360543					0.352273					0.355057
		1 min					0.386827					0.447727					0.407779					0.391463					0.390387
		4 min					0.457384					0.50656					0.486811					0.464904					0.467264
		1 hr					0.55462					0.694773					0.646881					0.582169					0.626363
138	163	3 sec					0.259958					0.251023					0.257043					0.241907					0.243425
		15 sec					0.238001					0.300285					0.328462					0.307578					0.312114
		1 min					0.367195					0.374198					0.404179					0.378536					0.38476
		4 min					0.377092					0.453883					0.497227					0.458505					0.47542
		1 hr					0.585248					0.657254					0.668172					0.616196					0.653961
150	163	3 sec										0.1373					0.160473					0.144756					0.149169
		15 sec										0.202621					0.231859					0.205058					0.213862
		1 min										0.282322					0.317838					0.288241					0.298293
		4 min										0.378752					0.429673					0.375352					0.407019
		1 hr										0.61494					0.630449					0.583541					0.624442
150	164	3 sec															0.1234										0.113073
		15 sec															0.185716										0.167728
		1 min															0.266375										0.245259
		4 min															0.373667										0.353856
		1 hr															0.567427										0.564319
164	172	3 sec										0.415182					0.407073					0.407467					0.407664
		15 sec										0.420206					0.41664					0.413107					0.41706
		1 min										0.464381					0.435299					0.428107					0.446955
		4 min										0.584956					0.531649					0.49686					0.554676
		1 hr										0.628744					0.619188					0.611538					0.619072
164	178	3 sec					0.699308										0.695097					0.690224					0.680185
		15 sec					0.703364										0.695694					0.690153					0.680162
		1 min					0.708472										0.708205					0.69718					0.701924
		4 min					0.738031										0.757432					0.736609					0.754341
		1 hr					0.785026										0.789077					0.782981					0.781447
164	185	3 sec										0.786729
		15 sec										0.781147
		1 min										0.797902
		4 min										0.846396
		1 hr										0.850697
165	178	3 sec															0.760104					0.754432
		15 sec															0.758717					0.758009
		1 min															0.774029					0.76535
		4 min															0.828305					0.808254
		1 hr															0.857407					0.857407
179	185	3 sec	0.445531	0.554469	0.497	0.985192	0.767687						0.197858	0.802142	0.360449	0.925	0.813299	0.332808	0.667192	0.355519	0.924366	0.735049	0.145927	0.854073	0.298915	0.83205	0.754251
		15 sec	1		0.881268	0	0.881268						1		0.969612	0	0.969612	0.132266	0.867734	0.446311	0.981049	0.910322	1		0.943925	0	0.943925
		1 min	1		0.963958	0	0.963958						1		0.940829	0	0.940829	1		1.00787	0	1.00787	1		0.94953	0	0.94953
		4 min	1		0.98583	0	0.98583						1		0.950246	0	0.950246	1		1.0395	0	1.0395	1		0.964206	0	0.964206
		1 hr	1		0.994272	0	0.994272						1		0.982973	0	0.982973	1		0.988518	0	0.988518	1		0.978518	0	0.978518
179	205	3 sec															0.932361					0.923981					0.909031
		15 sec															0.979332					0.964672					0.955601
		1 min															0.981194					0.968195					0.967856
		4 min															0.989133					0.981824					0.975642
		1 hr															0.978134					0.975563					0.967396
186	201	3 sec					0.981491										0.970547					0.971594					0.966493
		15 sec					0.977702										0.96465					0.961951					0.956325
		1 min					0.95909										0.96302					0.959014					0.965119
		4 min					0.976343										0.957779					0.965737					0.966297
		1 hr					0.978339										0.9506					0.961176					0.964647
186	205	3 sec					0.978904					0.975931					0.95295					0.954029					0.94475
		15 sec					0.991252					0.971162					0.973159					0.971816					0.961502
		1 min					0.97442					0.974655					0.977222					0.972272					0.977794
		4 min					0.985526					0.999838					0.97329					0.978574					0.981503
		1 hr					0.987036					0.977405					0.96528					0.977776					0.972319
187	205	3 sec					0.979668					0.976558					0.951323					0.953122					0.944772
		15 sec					0.989802					0.974231					0.971703					0.973353					0.965137
		1 min					0.974565					0.97069					0.974426					0.970781					0.976927
		4 min					0.986526					1.00339					0.972918					0.97938					0.981725
		1 hr					0.987866					0.982624					0.966088					0.977659					0.973761
