# Supplementary material for: Interplay of disordered and ordered regions of a human small heat shock protein yields an ensemble of ‘quasi-ordered’ states
Source: eLife. 2019 Oct 1;8:e50259. doi: 10.7554/eLife.50259 (PMC6791718; doi:10.7554/eLife.50259)
Supplement: Figure 7—source data 2. — Statistics listed are for C137S forms of the following mutants of HSPB1. Sequence coverage takes into account the lack of observed deuterium uptake in the first two residues of each peptide. Back-exchange is calculated as the % deuterium uptake of the fully deuterated sample divided by the theoretical maximum deuteration for each peptide (89%), excluding prolines and the first two residues. [file elife-50259-fig7-data2.xlsx]

## Sheet: Sheet1
Statistics for HDXMS experiments on all mutants. Statistics listed are for C137S forms of the following mutants of HSPB1. Sequence coverage takes into account the lack of observed deuterium uptake in the first two residues of each peptide. Back-exchange is calculated as the % deuterium uptake of the fully deuterated sample divided by the theoretical maximum deuteration for each peptide (89%), exc…
Dataset/construct	WT	HSPB1­dimer	G34R	P39L	G84R
Rxn conditions	Room temp. (25°C), pH 7.5, diluted 10X for final 89% D2O
Time points	3 sec, 15 sec, 1 min, 4 min, 1 hour, fully deuterated
# of peptides	29	29	38	36	34
Sequence coverage	0.9	0.93	0.93	0.94	0.93
Redundancy	1.8	1.9	2.5	2.4	2.2
% Back-exchange (mean/IQR)	24.6/14.0	24.5/12.9	20.4/13.8	20.3/13.6	19.2/14.7
Replicates	Single, representative of 3 biological replicates		Single
Significance threshold	Qualitative assessment of differences > 5% exchange from WT
